# Supplementary material for: Benchmarking Observational Analyses Against Randomized Trials: a Review of Studies Assessing Propensity Score Methods
Source: Springer Nature journal article supplement (doi:10.1007/s11606-020-05713-5), 2020-03-19
Supplement: MOESM2 [file 17815570]

**Appendix 2: Supplemental Tables**

**Appendix Table 1:** Sensitivity analysis for extreme relative RR results from randomized controlled trials and observational studies in the included systematic reviews.

| **Subgroups** | **Number of comparisons** | **Relative RR <0.50 or >2.00 (%)** | **Relative RR <0.70 or >1.43 (%)** | **Relative RR <0.90 or >1.11 (%)** |
| --- | --- | --- | --- | --- |
| All comparisons | 127 | 31 (24) | 68 (54) | 104 (82) |
| ***Source of data*** |  |  |  |  |
| Dahabreh, 2012 | 17 | 1 (6) | 6 (35) | 13 (76) |
| Lonjon, 2014 | 48 | 16 (33) | 28 (58) | 43 (90) |
| Zhang, 2014 (a) | 8 | 1 (13) | 4 (50) | 6 (75) |
| Zhang, 2014 (b) | 20 | 6 (3) | 12 (60) | 15 (75) |
| Kitsios, 2015 | 18 | 2 (11) | 7 (39) | 14 (78) |
| Hemkens, 2016 | 16 | 5 (31) | 11 (69) | 13 (81) |
| ***Intervention type*** |  |  |  |  |
| Both drugs | 38 | 8 (21) | 17 (45) | 27 (71) |
| At least one not a drug | 89 | 23 (26) | 51 (57) | 77 (87) |
| ***Effect of treatment*** | |  |  |  |
| Adverse effect | 12 | 4 (33) | 6 (50) | 9 (75) |
| Intended effect | 115 | 27 (23) | 62 (54) | 95 (83) |
| ***Outcome type*** | |  |  |  |
| Death from any cause | 102 | 24 (24) | 58 (57) | 84 (82) |
| Other outcomes | 25 | 7 (28) | 10 (40) | 20 (80) |

Percentages are calculated for each comparison source or type. RR = relative risk.

**Appendix Table 2:** Kappa statistic for agreement of statistically significant estimates by design.

| **Expected Agreement** | **Agreement** | **Kappa** | **Std. Err.** | **Z** | **Prob>Z** |
| --- | --- | --- | --- | --- | --- |
| 66.14% | 60.13% | 0.1508 | 0.0673 | 2.24 | 0.0125 |
